# Supplementary material for: Evidence of Reliable Gastro-Resistance of Novel Enteric Ready-to-Fill Capsules Simplifying Pharmaceutical Manufacturing
Source: MDPI journal article supplement (doi:10.3390/pharmaceutics15112592), 2023-11-06
Supplement: s1 [file s1]

# Supplementary Materials: Evidence of Reliable Gastro-Resistance of Novel Enteric Ready-to-Fill Capsules Simplifying Pharmaceutical Manufacturing

Jesús Alberto Afonso Urich, Anna Fedorko, Bettina Hölzer and Johannes Khinast

**Table S1.** Diclofenac impurities summary after acid exposure for EUDRACAP® enteric and Diclovit®.

| Name.                                                   | EUDRACAP® after 2h |      | Diclovit® after 2h |      |
|---------------------------------------------------------|--------------------|------|--------------------|------|
|                                                         | Mean %             | SD % | Mean %             | SD % |
| Oxindole                                                | 0.00               | 0.00 | 0.00               | 0.00 |
| Peak RRT ~0.51                                          | 0.01               | 0.01 | 0.00               | 0.00 |
| Peak RRT ~0.76                                          | 0.00               | 0.00 | 0.02               | 0.00 |
| Diclofenac-related compound D (diclofenac bromo analog) | 0.28               | 0.02 | 0.28               | 0.02 |
| Diclofenac-related compound A                           | 0.00               | 0.00 | 0.00               | 0.00 |
| Diclofenac-alcohol analog                               | 0.00               | 0.00 | 0.03               | 0.00 |
| Peak RRT ~1.60                                          | 0.15               | 0.03 | 0.04               | 0.09 |
| Peak RRT ~1.79                                          | 0.00               | 0.00 | 0.04               | 0.00 |
| Diclofenac-benzaldehyde analog                          | 0.00               | 0.00 | 0.01               | 0.00 |
| Peak RRT ~2.43                                          | 0.00               | 0.00 | 0.01               | 0.02 |
| Total impurities                                        | 0.44               | 0.04 | 0.44               | 0.09 |

**Table S2.** Diclofenac sodium delayed-release tablets acceptance criteria from USP.

| Name                                                                   | RRT  | Acceptance criteria, NMT(%) |
|------------------------------------------------------------------------|------|-----------------------------|
| Oxindole <sup>a,b</sup>                                                | 0.4  | —                           |
| Diclofenac                                                             | 1    | —                           |
| Diclofenac-related compound D (diclofenac bromo analog) <sup>c,d</sup> | 1.04 | —                           |
| Diclofenac-related compound A                                          | 1.48 | 0.5                         |
| Diclofenac-alcohol analog <sup>d,b</sup>                               | 1.55 | —                           |
| Diclofenac-benzaldehyde analog <sup>e,b</sup>                          | 1.81 | —                           |
| Any individual unspecified impurity                                    | —    | 0.5                         |
| Total impurities <sup>b</sup>                                          | —    | 1.5                         |

<sup>a</sup> 1,3-Dihydro-2H-indol-2-one. <sup>b</sup> Process-related impurities, not to be counted in total impurities. <sup>c</sup> 2-[(2-Bromo-6-chlorophenyl)amino]phenyl]acetic acid. <sup>d</sup> {2-[(2,6-Dichlorophenyl)amino]phenyl}methanol. <sup>e</sup> 2-[(2,6-Dichlorophenyl)amino]benzaldehyde.

**Equation S1.** Percentage of individual impurity calculation for diclofenac sodium delayed-release tablets from USP.

$$Result = \left( \frac{rU}{rS} \right) \times \left( \frac{CS}{CU} \right) \times 100$$

rU = peak response of each individual impurity from the Sample solution

rS = peak response of diclofenac from the Standard solution

CS = concentration of diclofenac Sodium in the Standard solution (mg/mL)

CU = nominal concentration of diclofenac sodium in the Sample solution (mg/mL)

**Table S3.** Omeprazole impurities summary after acid exposure for EUDRACAP® enteric and Losec®.

| Name                                 | EUDRACAP®<br>after 2h |      | EUDRACAP®<br>after 4h |      | Losec® after 2h |      |
|--------------------------------------|-----------------------|------|-----------------------|------|-----------------|------|
|                                      | Mean %                | SD % | Mean %                | SD % | Mean %          | SD % |
| Peak RRT ~0.17                       | 0.00                  | 0.00 | 0.00                  | 0.00 | 0.06            | 0.04 |
| Peak RRT ~0.27                       | 0.01                  | 0.01 | 0.06                  | 0.02 | 0.24            | 0.09 |
| Omeprazole-related compounds F and G | 0.02                  | 0.05 | 0.22                  | 0.08 | 0.67            | 0.23 |
| Peak RRT ~0.47                       | 0.01                  | 0.01 | 0.03                  | 0.00 | 0.00            | 0.00 |
| Peak RRT ~0.49                       | 0.01                  | 0.01 | 0.01                  | 0.01 | 0.02            | 0.00 |
| Peak RRT ~0.57                       | 0.00                  | 0.00 | 0.02                  | 0.00 | 0.07            | 0.01 |
| 5-Methoxy-1H-benzimidazole-2-thiol   | 0.00                  | 0.00 | 0.00                  | 0.00 | 0.01            | 0.01 |
| Peak RRT ~0.66                       | 0.00                  | 0.00 | 0.00                  | 0.00 | 0.01            | 0.01 |
| Peak RRT ~0.70                       | 0.02                  | 0.00 | 0.03                  | 0.00 | 0.02            | 0.00 |
| Peak RRT ~0.77                       | 0.00                  | 0.00 | 0.06                  | 0.01 | 0.05            | 0.01 |
| Peak RRT ~0.81                       | 0.13                  | 0.02 | 0.13                  | 0.01 | 0.03            | 0.01 |
| Peak RRT ~0.85                       | 0.00                  | 0.00 | 0.00                  | 0.00 | 0.03            | 0.01 |
| Peak RRT ~0.94                       | 0.00                  | 0.00 | 0.03                  | 0.01 | 0.00            | 0.00 |
| Peak RRT ~1.13                       | 0.02                  | 0.00 | 0.01                  | 0.01 | 0.01            | 0.02 |
| Peak RRT ~1.27                       | 0.00                  | 0.00 | 0.08                  | 0.02 | 0.00            | 0.00 |
| Peak RRT ~1.42                       | 0.00                  | 0.00 | 0.00                  | 0.00 | 0.29            | 0.09 |
| Peak RRT ~1.95                       | 0.00                  | 0.00 | 0.06                  | 0.01 | 0.00            | 0.00 |
| Peak RRT ~2.06                       | 0.00                  | 0.00 | 0.00                  | 0.00 | 0.00            | 0.00 |
| Total impurities                     | 0.22                  | 0.06 | 0.74                  | 0.09 | 1.51            | 0.27 |

**Table S4.** Omeprazole delayed-release capsules acceptance criteria from the USP.

| Name                                              | RRT  | RRF | Acceptance criteria,<br>NMT(%) |
|---------------------------------------------------|------|-----|--------------------------------|
| Omeprazole-related compounds F and G <sup>a</sup> | 0.33 | 1.6 | 0.5                            |
| 5-Methoxy-1H-benzimidazole-2-thiol                | 0.64 | 3.1 | 0.5                            |
| Any other individual impurity                     | —    | 1   | 0.5                            |
| Total impurities                                  | —    | —   | 2                              |

<sup>a</sup> These impurities undergo transformation in the solution to form a conversion product, which elutes at the relative retention time of 0.33.

**Equation S2.** Percentage of individual impurity calculation for omeprazole delayed-release capsules from the USP.

$$Result = \left( \frac{rU}{rS} \right) \times \left( \frac{CS}{CU} \right) \times \left( \frac{1}{F} \right) \times 100$$

Where:

rU = peak response for each impurity from the Sample solution

rS = peak response for omeprazole from the Standard solution

CS = concentration of omeprazole in the Standard solution (mg/mL)

CU = nominal concentration of omeprazole in the Sample solution (mg/mL)

F = relative response factor

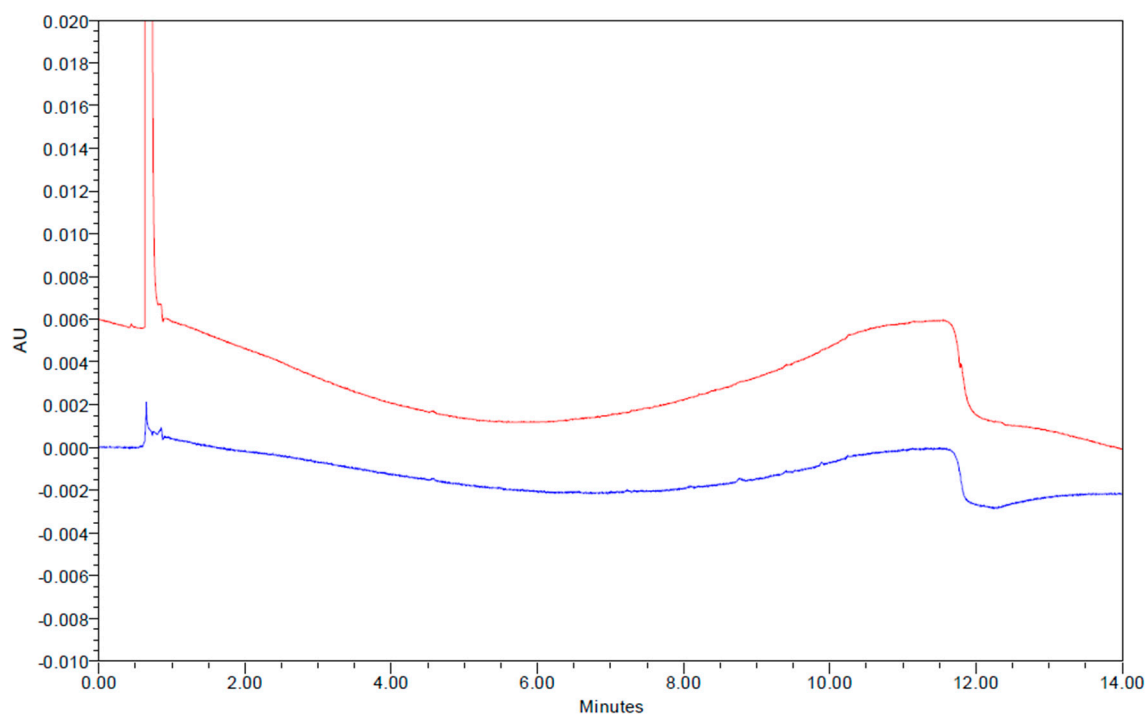

**Figure S1.** Chromatogram at 280nm (diclofenac analysis RT 4.3 min) of acid media after 2h for EU-DRACAP® enteric (blue) and Diclovit® (red).

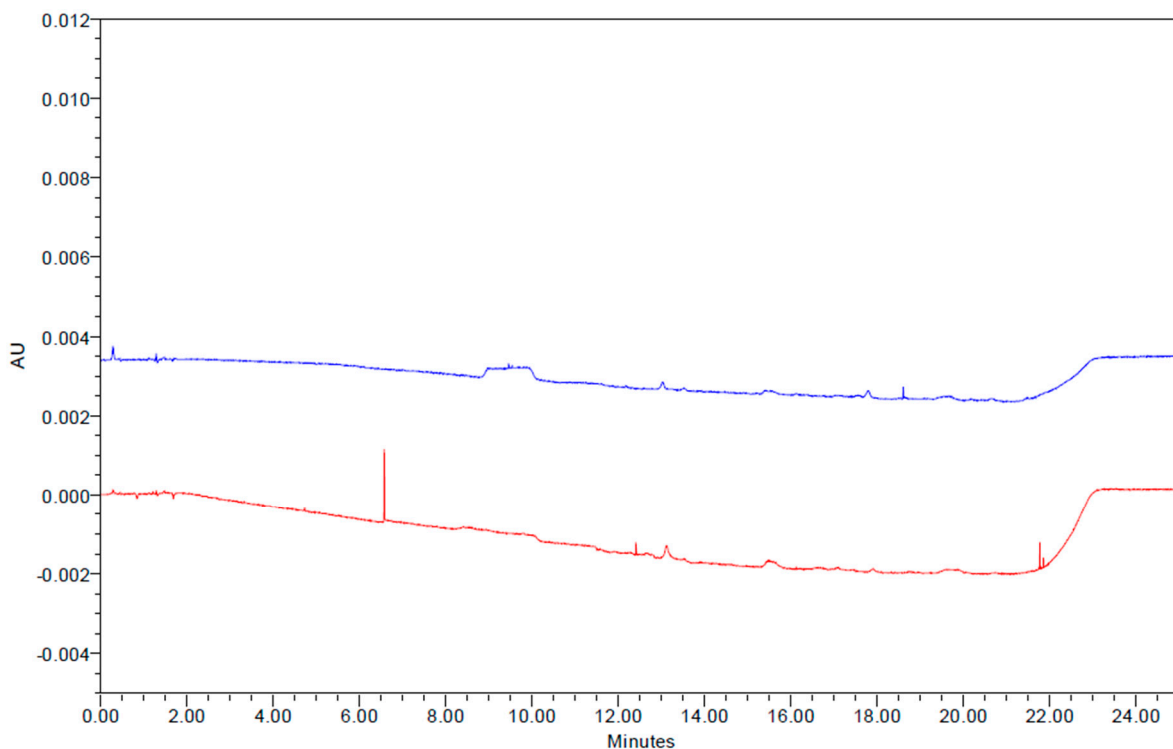

**Figure S2.** Chromatogram at 305nm (omeprazole analysis RT 10.8 min) of acid media after 2h for EUDRACAP® enteric (blue) and Losec® (red).
